# Supplementary material for: Rare Earth Elements as Emerging Contaminants in the Surface Sediments of Maroon-Jarahi Sub-basin (Persian Gulf Coasts): Assessment of Pollution, Distribution, and Potential Ecological-Health Risk
Source: Research Square preprint supplement (doi:10.21203/rs.3.rs-7275711/v1), 2025-08-08
Supplement: Supplementary file 1 [file f642d9a851ee2b4cffa63aac.docx]

**Highlights**

- Jarahi River sub-basin in the downstream area showed the highest concentration of LREE, MREE, and HREE.
- The higher REE concentrations in sediments were contributed by anthropogenic sources.
- Nd, Sm, and Gd were most enriched elements in the surface sediments of Maroon-Jarahi sub-basin.
- Low ecological risks of REEs appeared in the Maroon-Jarahi sub-basin.
- The human health risks of REEs exposure in the surface sediments of area were negligible.
