# Supplementary figures and images for: Rare Earth Elements as Emerging Contaminants in the Surface Sediments of Maroon-Jarahi Sub-basin (Persian Gulf Coasts): Assessment of Pollution, Distribution, and Potential Ecological-Health Risk
Source: Research Square preprint supplement (doi:10.21203/rs.3.rs-7275711/v1), 2025-08-08

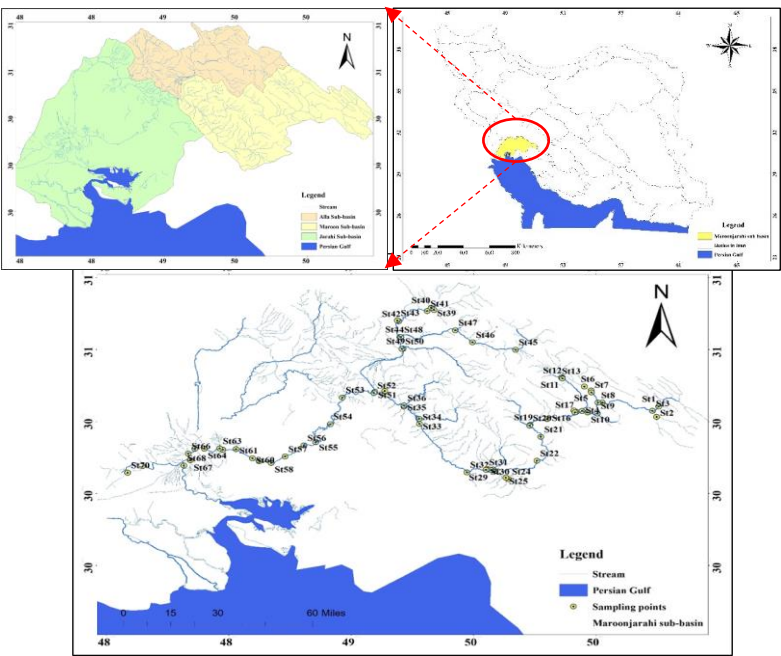

**Maroon-Jarahi sub-basin**

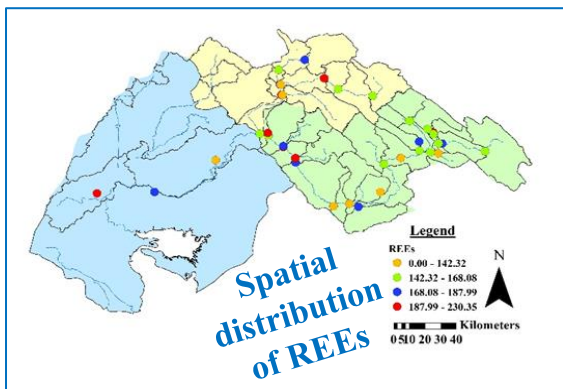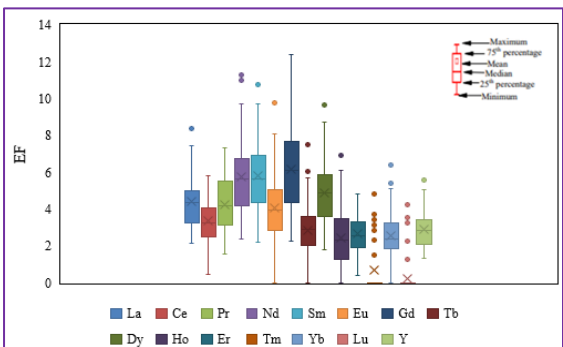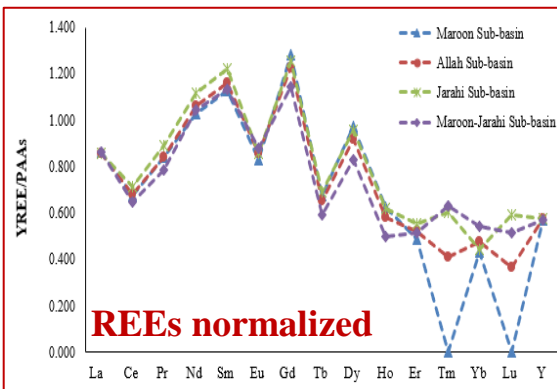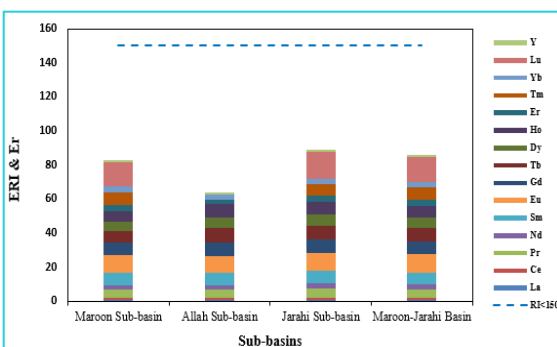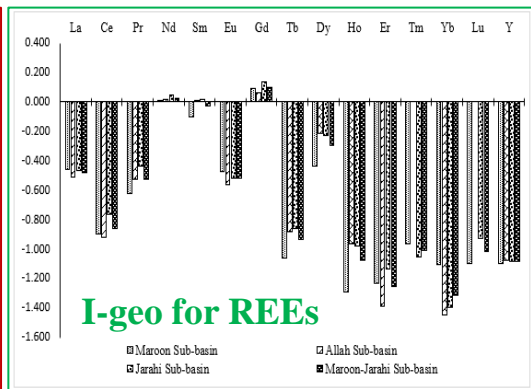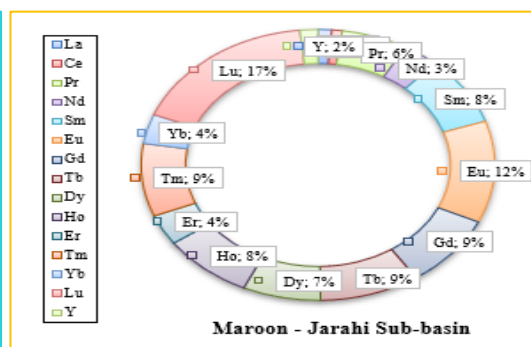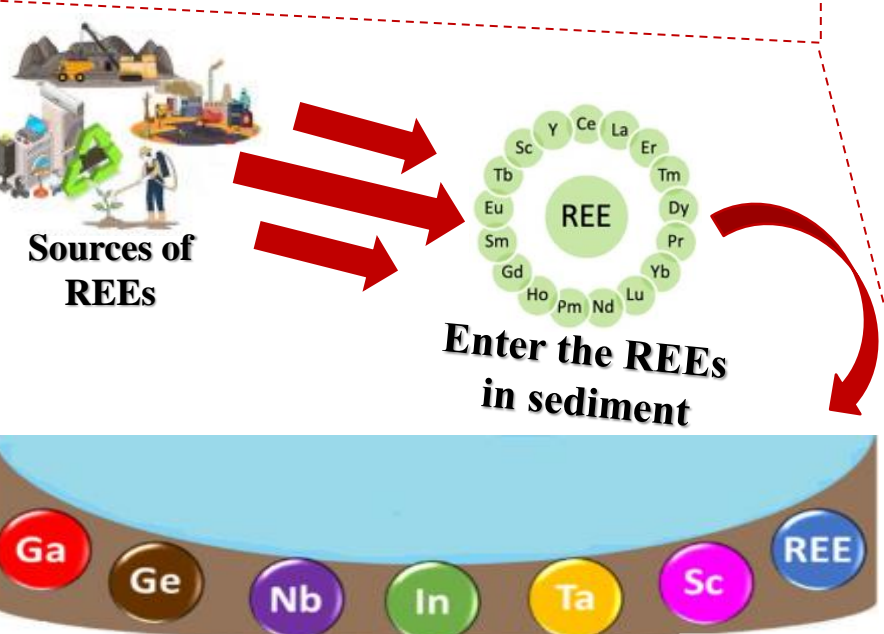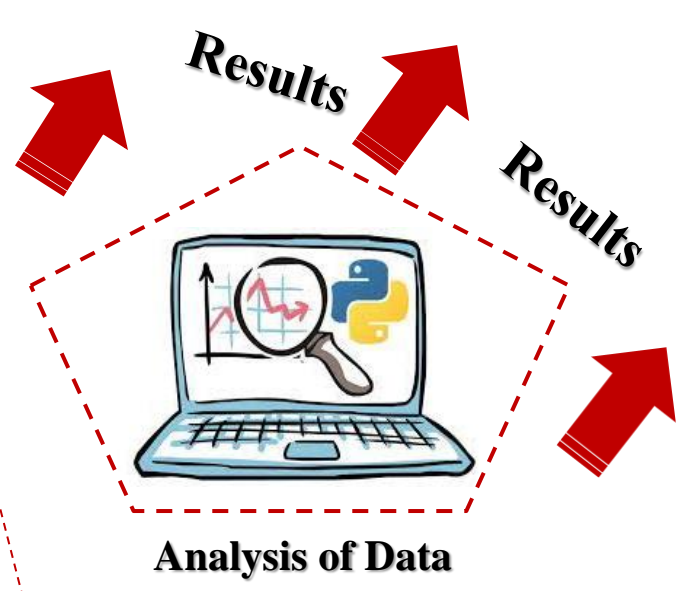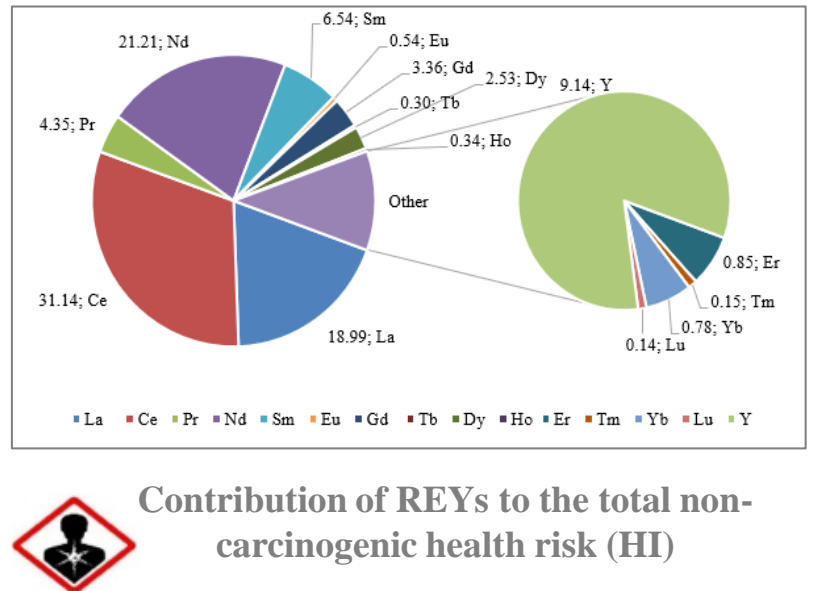

Supplement: Supplementary file 1 [file 885204e9d503028ecdd4f543.pdf]
